# Supplementary material for: Developmental changes in bone mechanics from Florida manatees (Trichechus manatus latirostris), obligate swimming mammals
Source: Oxford University Press journal article supplement (doi:10.1242/jeb.213009), 2020-01-01
Supplement: jeb213009supp.pdf [file jeb213009supp.pdf]

Table S1. Total length, sex, and vertebral process length of 20 manatees sampled for the present study

| Developmental stage | Field ID  | TL (cm) | Sex        | Average vertebral process length (mm) |             |               |                |
|---------------------|-----------|---------|------------|---------------------------------------|-------------|---------------|----------------|
|                     |           |         |            | thoracic                              | lumbar      | caudal (anus) | caudal (fluke) |
| perinatal           | MEC16038  | 113     | F          | 29.85±2.09                            | 22.17±1.26  | 23.78±2.27    | 14.94±2.16     |
|                     |           |         |            | 17.99±0.48                            | 46.61±7.14  | 41.09±0.67    | 36.19±1.37     |
|                     | MEC16048  | 130     | F          | 24.09±0.73                            | 22.43±0.42  | 16.12±1.49    | 13.76±2.02     |
|                     |           |         |            | 18.34±2.53                            | 37.88±2.58  | 32.49±2.31    | 33.85±2.49     |
|                     | MNW16030  | 118     | M          | 21.33                                 | 28.52       | 13.2±1.31     | 7.18±0.42      |
| MNW16017            | 98        | M       | 16.24±0.37 | 31.96                                 | 20.92±5     | 26.27±0.01    |                |
|                     |           |         | 21.17±0.26 | 28.11±3.98                            | 11.35±0.3   | 8.63±1.2      |                |
| MSW16058            | 119       | M       | 11.72±0.78 | 36.88±4.21                            | 28.25±0.72  | 32.18±1.96    |                |
|                     |           |         | 27.91±0.62 | 23.80±0.44                            | 18.11±1.61  | 7.81±1.33     |                |
|                     |           |         | 15.86±2.19 | 35.75±2.54                            | 36.31±2.68  | 32.44±2.37    |                |
| calf                | MNW16014  | 209     | F          | 54.99±0.82                            | 47.95±3.79  | 44.42±0.25    | 27.56±4.34     |
|                     |           |         |            | 34.54±0.66                            | 79.8±2.72   | 92.37±1.52    | 61.42±3.8      |
|                     | MSW16028  | 192     | F          | 49.26±2.56                            | 40.85±5.13  | 34.95±1.84    | 15.16±2.65     |
|                     |           |         |            | 24.51±0.92                            | 76.4±5.84   | 82.9±4.49     | 53.98±6.74     |
|                     | MSW16023  | 185     | F          | 28.60±4.89                            | 30.97±4.94  | 14.68±4.29    | 8.37±1.22      |
| 22.18±0.66          |           |         |            | 61.53±7.8                             | 65.1±1.58   | 47.85±3.13    |                |
| MNW16019            | 206       | M       | 29.58±1.27 | 30.97±4.94                            | 14.68 ±4.23 | 8.37±1.22     |                |
|                     |           |         | 46.96±0.74 | 80.99±1.34                            | 74.76±0.97  | 71.95±0.6     |                |
| SWFTM1603b          | 219       | M       | 60.77±4.79 | 42.59±0.5                             | 32.60±2.35  | 16.97±2.03    |                |
|                     |           |         | 48.12±1.12 | 84.97±11.29                           | 92.09±2.53  | 78.37±1.66    |                |
| subadult            | MEC16019  | 250     | F          | 62.34±0.49                            | 47.43±1.81  | 33.17±1.61    | 18.93±0.13     |
|                     |           |         |            | 30.61±1.42                            | 84.42±7.28  | 102.18±2.83   | 85.38±2.63     |
|                     | MEC16022  | 243     | F          | 40.96±9.51                            | 39.98±7.79  | 22.98±4.84    | 14.53±3.88     |
|                     |           |         |            | 55.47±0.9                             | 88.91±15.18 | 96.99±2.21    | 75.09±3.26     |
|                     | LPZ103313 | 256     | M          | 59.41±0.57                            | 48.22±0.05  | 33.37±0.91    | 19.73±0.41     |
| 31.69±1.01          |           |         |            | 10.3.48±6.71                          | 113.88±0.5  | 92.71±0.3     |                |
| MNW16018            | 245       | M       | 59.54±0.84 | 49.95±4.15                            | 36.30±2.17  | 17.8±0.48     |                |
|                     |           |         | 33.26±0.46 | 96.4±0.47                             | 89.16±0.9   | 56.81±8.7     |                |
| MNW16021            | 241       | M       | 67.58±0.15 | 46.60±3.55                            | 36.80±2.87  | 16.43±1.64    |                |
|                     |           |         | 44.54±0.57 | 99.35±9.21                            | 96.93±3.04  | 75.56±1.75    |                |
| adult               | MEC15085  | 292     | F          | 62.25±0.95                            | 46.02±0.71  | 29.74±2.39    | 21.15±4.05     |
|                     |           |         |            | 50.26±2.4                             | 133.98±2.91 | 117.75±2.69   | 90.65±4.14     |
|                     | MSW15072  | 308     | F          | 38.15                                 | 46.98       | 28.26±1.54    | 21.75±0.86     |
|                     |           |         |            | 43.95                                 | 177.5       | 144.5±1.75    | 117.82±2.64    |
|                     | MNW16016  | 310     | M          | 63.08±1.96                            | 46.55±1.91  | 37.69±7.11    | 23.69±3.8      |
| 68.31±1.25          |           |         |            | 138.2±8.08                            | 125.86±6.7  | 122.54±1.8    |                |
| MSE16016            | 308       | M       | 52.65±1.02 | 56.64±4.41                            | 36.28±4.39  | 17.31±2.49    |                |
|                     |           |         | 69.48±4.13 | 159.75±3.88                           | 122.63±8.43 | 89.01±2.88    |                |
| MSW16020            | 287       | M       | 60.90±1.33 | 61.09±1.62                            | 36.35±1.28  | 16.27±0.58    |                |
|                     |           |         | 34.47±0.28 | 123.46±6.91                           | 120.2±2.12  | 96.24±1.37    |                |

\* TL is total length. Average vertebral process lengths in black text denote spinous process, and in gray text represents transverse process length.

Table S2. Tukey *post hoc* ordered letters report for four-way ANOVA main effects

| Main effect         |                | <i>Post hoc</i> ordered letters |         |                           |
|---------------------|----------------|---------------------------------|---------|---------------------------|
|                     |                | $\sigma_y$ (MPa)                | E (MPa) | $U_r$ (Jmm <sup>3</sup> ) |
| developmental stage | perinatal      | C                               | C       | C                         |
|                     | calf           | B                               | B       | B                         |
|                     | subadult       | A                               | A       | A                         |
|                     | adult          | A                               | A       | A                         |
| region              | thoracic       | B                               |         | C                         |
|                     | lumbar         | B                               |         | BC                        |
|                     | caudal (anus)  | A                               |         | A                         |
|                     | caudal (fluke) | AB                              |         | AB                        |
| orientation         | rostrocaudal   | A                               | A       | A                         |
|                     | dorsoventral   | C                               | B       | B                         |
|                     | mediolateral   | B                               | B       | B                         |
| sex                 | female         | A                               | A       |                           |
|                     | male           | B                               | B       |                           |

\*Blanks denote no difference between groups for that mechanical property. Letters that are not A are significantly different from the greatest least squares mean.

Table S3. Tukey *post hoc* ordered letters report for significant interaction terms (developmental stage \* region and developmental stage \* sex) for  $\sigma_y$  (MPa)

|                       |                | <i>Post hoc</i> ordered letters |
|-----------------------|----------------|---------------------------------|
| Developmental stage * | Region         |                                 |
| perinatal             | thoracic       | E                               |
|                       | lumbar         | E                               |
|                       | caudal (anus)  | E                               |
|                       | caudal (fluke) | E                               |
| calf                  | thoracic       | DE                              |
|                       | lumbar         | CDE                             |
|                       | caudal (anus)  | AB                              |
|                       | caudal (fluke) | ABC                             |
| subadult              | thoracic       | ABC                             |
|                       | lumbar         | BC                              |
|                       | caudal (anus)  | A                               |
|                       | caudal (fluke) | AB                              |
| adult                 | thoracic       | AB                              |
|                       | lumbar         | AB                              |
|                       | caudal (anus)  | AB                              |
|                       | caudal (fluke) | BCD                             |
| Developmental stage * | Sex            |                                 |
| perinatal             | female         | E                               |
|                       | male           | E                               |
| calf                  | female         | CD                              |
|                       | male           | D                               |
| subadult              | female         | A                               |
|                       | male           | BCD                             |
| adult                 | female         | ABC                             |
|                       | male           | AB                              |

\*Letters that are not A are significantly different from the greatest least squares mean.

Table S4. Tukey *post hoc* ordered letters report for significant developmental stage by region interaction term for *E* (MPa)

| Developmental stage * | Region         | <i>Post hoc</i> ordered letters |
|-----------------------|----------------|---------------------------------|
| perinatal             | thoracic       | EF                              |
|                       | lumbar         | F                               |
|                       | caudal (anus)  | EF                              |
|                       | caudal (fluke) | EF                              |
| calf                  | thoracic       | DEF                             |
|                       | lumbar         | CDEF                            |
|                       | caudal (anus)  | ABCD                            |
|                       | caudal (fluke) | BCDE                            |
| subadult              | thoracic       | ABCD                            |
|                       | lumbar         | ABCD                            |
|                       | caudal (anus)  | AB                              |
|                       | caudal (fluke) | ABCD                            |
| adult                 | thoracic       | A                               |
|                       | lumbar         | ABC                             |
|                       | caudal (anus)  | ABCD                            |
|                       | caudal (fluke) | BCDE                            |

\*Letters that are not A are significantly different from the greatest least squares mean.

Table S5. Tukey *post hoc* ordered letters report for significant interaction terms (developmental stage \* region and developmental stage \* sex) for  $U_r$  (Jmm<sup>3</sup>)

|                       |                | <i>Post hoc</i> ordered letters |
|-----------------------|----------------|---------------------------------|
| Developmental stage * | Region         |                                 |
| perinatal             | thoracic       | F                               |
|                       | lumbar         | F                               |
|                       | caudal (anus)  | EF                              |
|                       | caudal (fluke) | CDEF                            |
| calf                  | thoracic       | F                               |
|                       | lumbar         | DEF                             |
|                       | caudal (anus)  | ABCD                            |
|                       | caudal (fluke) | ABC                             |
| subadult              | thoracic       | ABCDEF                          |
|                       | lumbar         | BCDEF                           |
|                       | caudal (anus)  | AB                              |
|                       | caudal (fluke) | ABC                             |
| adult                 | thoracic       | ABCDE                           |
|                       | lumbar         | AB                              |
|                       | caudal (anus)  | A                               |
|                       | caudal (fluke) | ABCDEF                          |
| Developmental stage * | Sex            |                                 |
| perinatal             | female         | D                               |
|                       | male           | CD                              |
| calf                  | female         | BC                              |
|                       | male           | BCD                             |
| subadult              | female         | A                               |
|                       | male           | BC                              |
| adult                 | female         | AB                              |
|                       | male           | A                               |

\*Letters that are not A are significantly different from the greatest least squares mean.

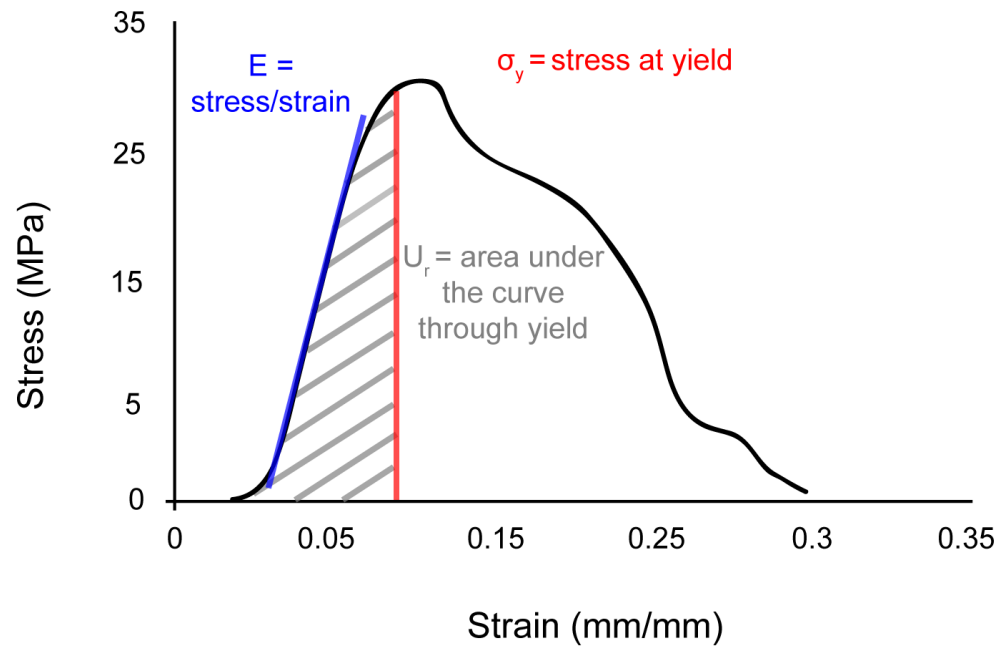

Figure S1. Stress-strain curve of an adult Florida manatee's vertebral trabecular bone in compression. Three values were gleaned from each curve: stiffness ( $E$ ; resistance to deformation), yield strength ( $\sigma_y$ ; resistance to permanent deformation) and toughness ( $U_r$ ; ability to absorb energy up through yield).
